# Supplementary material for: Irreversible catalytic methylcyclohexane dehydrogenation by surface protonics at low temperature
Source: Royal Society of Chemistry journal article supplement (doi:10.1039/c9ra00407f), 2019-01-01
Supplement: c9ra00407f1.pdf [file c9ra00407f1.pdf]

## ***ESI: Electronic supplementary information***

# Irreversible catalytic methylcyclohexane dehydrogenation by surface protonics at low temperature

*Kent Takise<sup>a</sup>, Ayaka Sato<sup>a</sup>, Kota Murakami<sup>a</sup>, Shuhei Ogo<sup>a</sup>, Jeong Gil Seo<sup>a,b</sup>, Ken-ichi Imagawa<sup>c</sup>,  
Shigeru Kado<sup>c</sup>, Yasushi Sekine<sup>a†</sup>*

<sup>a</sup> Waseda University, Department of Applied Chemistry, 3-4-1, Okubo, Shinjuku, Tokyo, 169-  
8555 Japan

<sup>b</sup> Myongji University, Department of Energy Science and Technology, 116 Myongji-ro, Yongin-si,  
Gyeonggi-do 17058, Republic of Korea

<sup>c</sup> R&D Center, Chiyoda Corporation, 3-13, Moriya-cho, Kanagawa, Yokohama, 221-0022, Japan

### **First-principles calculation**

Theoretical analysis for vibrational spectral analysis was conducted using DFT calculations. All calculations were conducted using the Vienna *ab initio* simulation package (VASP) ver. 5.4.1<sup>a, b</sup>. Core–valence correlation effects were included with the projector-augmented wave (PAW)

method<sup>b,c</sup>. Using plane-wave basis sets with kinetic energy lower than 400 eV, the valence part wave functions were expanded. All calculations were conducted using re-parameterized Perdew–Burke–Ernzerhof (RPBE) as the exchange–correlation functional<sup>d,e</sup>. In terms of  $k$ -space,  $0.04 \text{ \AA}^{-1}$  in Monkhorst–Pack reciprocal space was used. The first-order Methfessel–Paxton method with  $\sigma = 0.2$  was adopted as the smearing method. These calculations were done in a spin-polarized manner. The Pt fcc (111) surface was modeled as having Pt 16 atoms 4 layers. During geometry optimization, the top two layers were relaxed. The model was constructed as repeated slabs separated by a  $15 \text{ \AA}^{-1}$  vacuum layer. Equatorial MCH ( $\text{C}_7\text{H}_{14}$ ) and dehydrogenated species ( $\text{C}_7\text{H}_{13}$ ) were adsorbed over the Pt slab. The adsorbate geometries were fully relaxed. Furthermore, the DFT-D3 method of Grimme was adopted for correcting the van der Waals force. The adsorption energy was calculated using the following equation (eqns. S1 and S2).

$$E(\text{MCH adsorption}) = E(\text{MCH/slab}) - E(\text{slab}) - E(\text{MCH}) \quad \text{eqn. S1}$$

$$E(\text{C}_7\text{H}_{13} \text{ adsorption}) = E(\text{C}_7\text{H}_{13}/\text{slab}) - E(\text{slab}) - E(\text{MCH}) + E(\text{H}_2)/2 \quad \text{eqn. S2}$$

The energy and geometry of MCH and  $\text{H}_2$  molecules were optimized by placing the molecules in a  $10 \text{ \AA}$  cubic box. Vibrational frequencies of adsorbates were calculated by diagonalizing the Hessian matrix computed using a finite-difference method.

(a) Kresse, G.; Hafner, J. *Ab initio* molecular dynamics for liquid metals. *Phys. Rev. B* **1993**, *47*, 558–561.

(b) Kresse, G.; Furthmüller, J. Efficiency of ab-initio total energy calculations for metals and semiconductors using a plane-wave basis set. *Comput. Mat. Sci.* **1996**, *6*, 15–50.

(c) Kresse, G.; Joubert, D. From ultrasoft pseudopotentials to the projector augmented-wave method. *Phys. Rev. B* **1999**, *59*, 1758–1775.

(d) Perdew, J.P.; Burke, K.; Ernzerhof, M. Generalized Gradient Approximation Made Simple. *Phys. Rev. Lett.* **1996**, *77*, 3865–3868.

(e) Hammer, B.; Hansen, L.B.; Nøskov, J.K. Improved adsorption energetics within density-functional theory using revised Perdew-Burke-Ernzerhof functionals. *Phys. Rev. B* **1999**, *59*, 7413–7421.

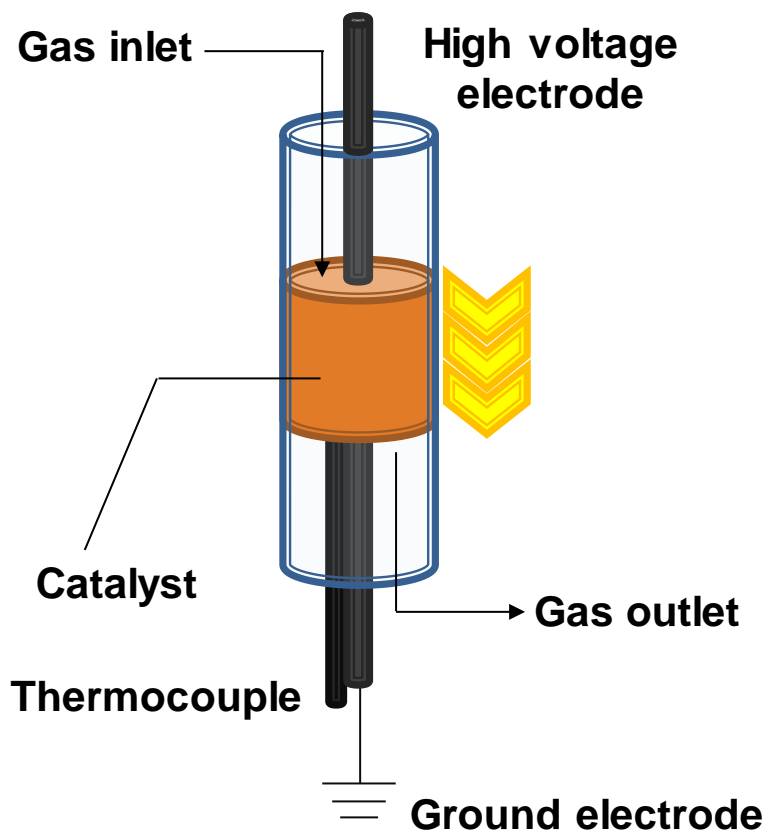

Figure S1 Catalyst bed set-up for MCH dehydrogenation in the electric field.

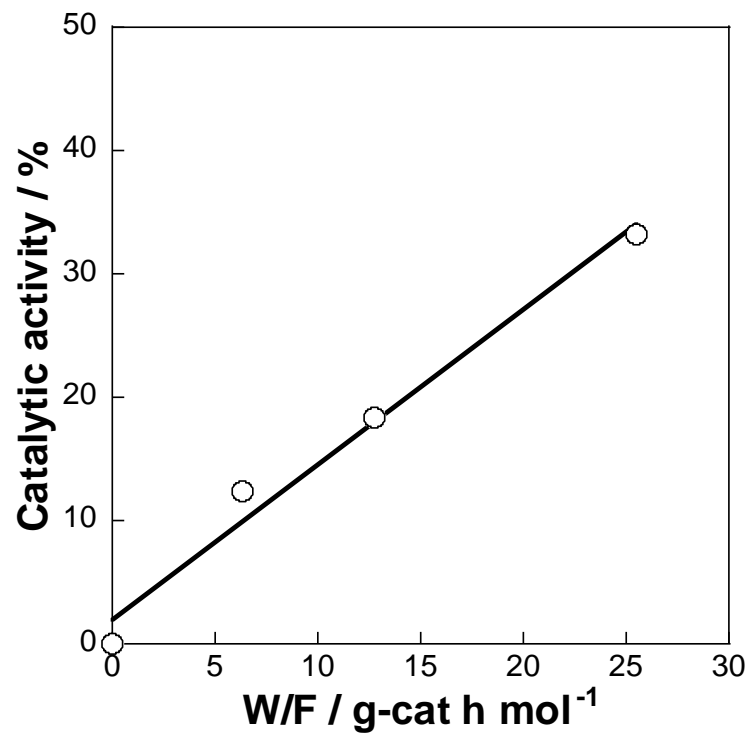

Figure S2 Relation between catalytic activity and W/F ratio in the electric field at 423 K: gas supply MCH : Ar = (3.2, 6.4, 12.8) : (15, 30, 60) (total flow 18.2, 36.4, 72.8 mL min<sup>-1</sup>); input current 3 mA.

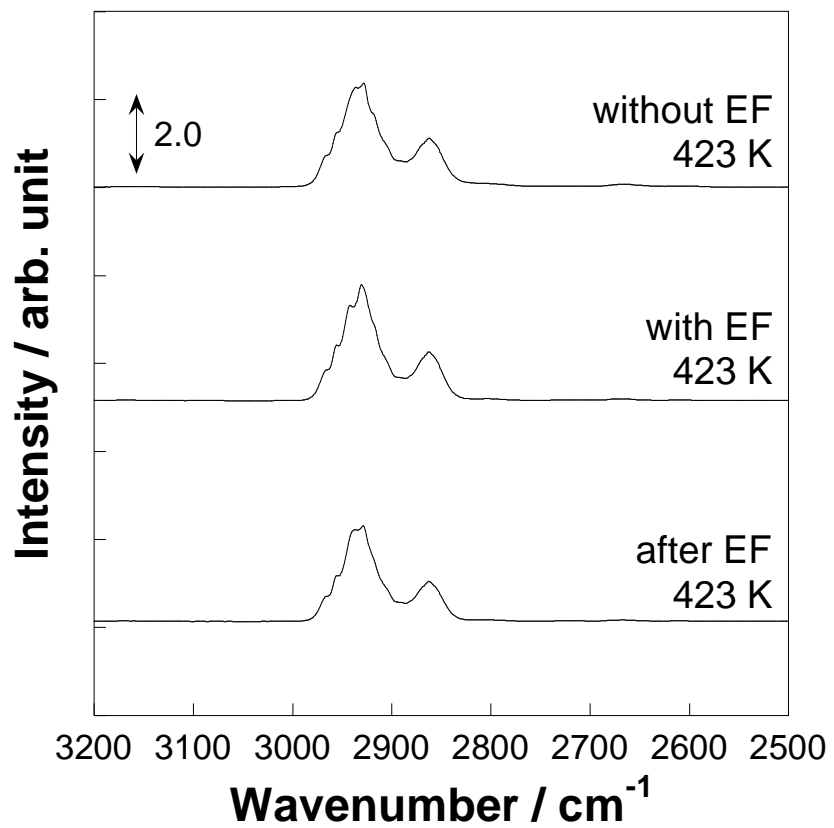

Figure S3 Spectra of *operando* DRIFTS measurements of bare CeO<sub>2</sub> in the electric field at 423 K.

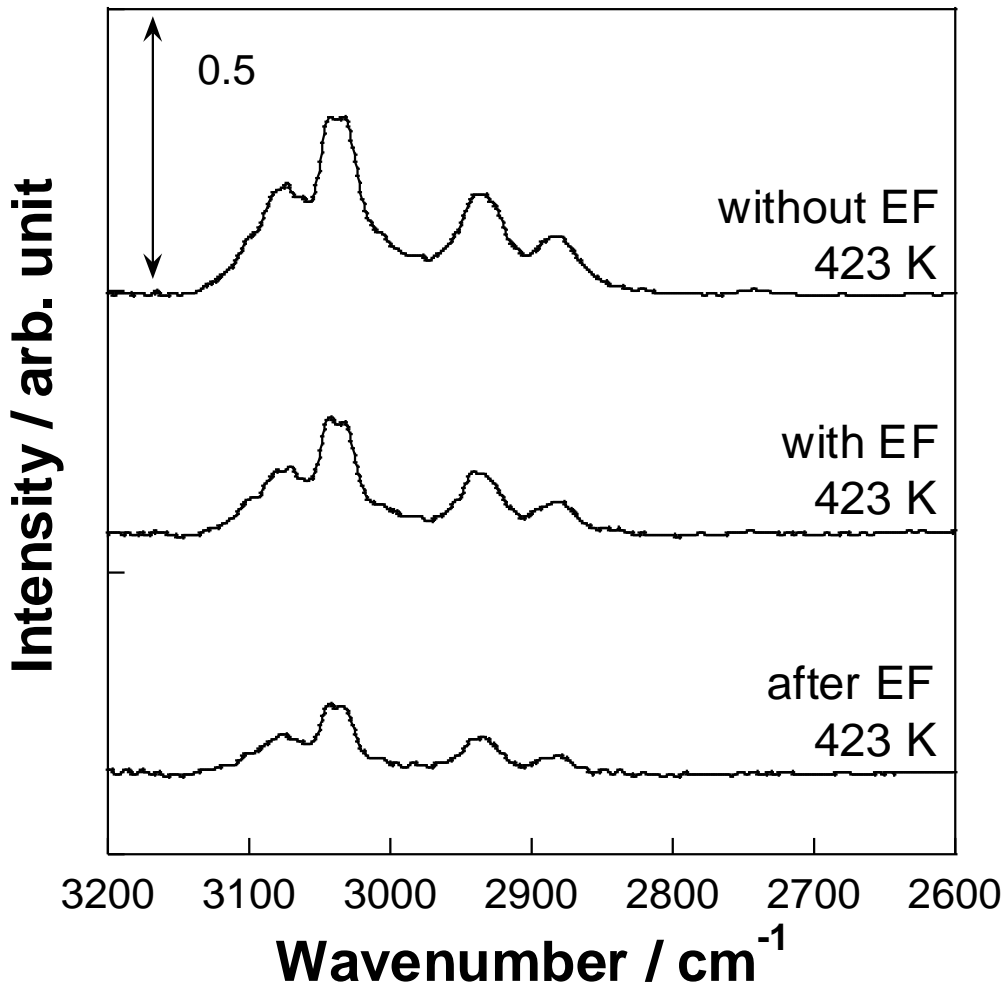

Figure S4 Spectra of *operando* DRIFTS measurements of 3wt%Pt/CeO<sub>2</sub> during toluene feed in the electric field at 423 K.

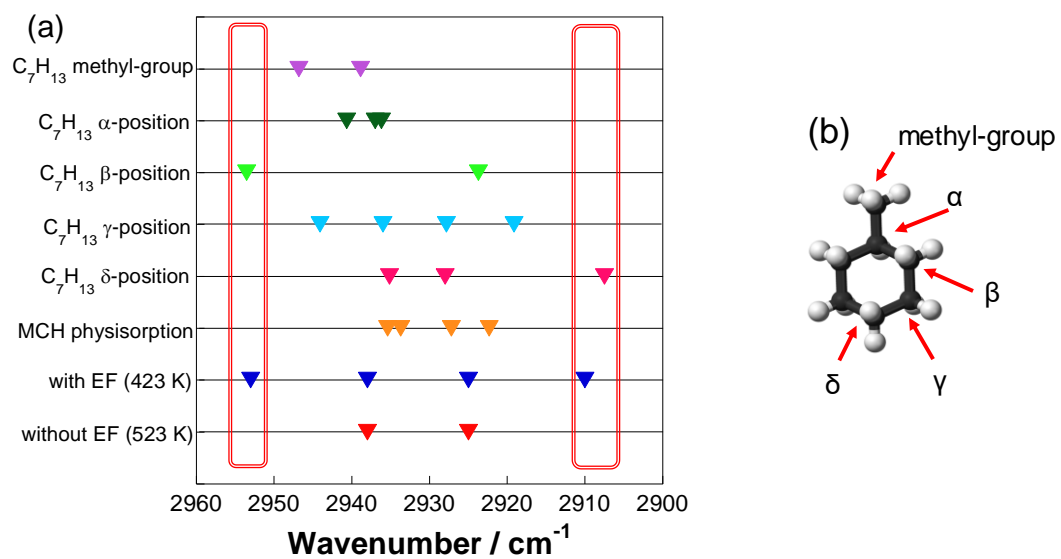

Figure S5 Theoretical wavenumbers of C–H stretching for IR peaks in various positions based on DFT calculation and experimental wavenumber of them for both conditions: with the electric field at 423 K and without the electric field at 523 K.



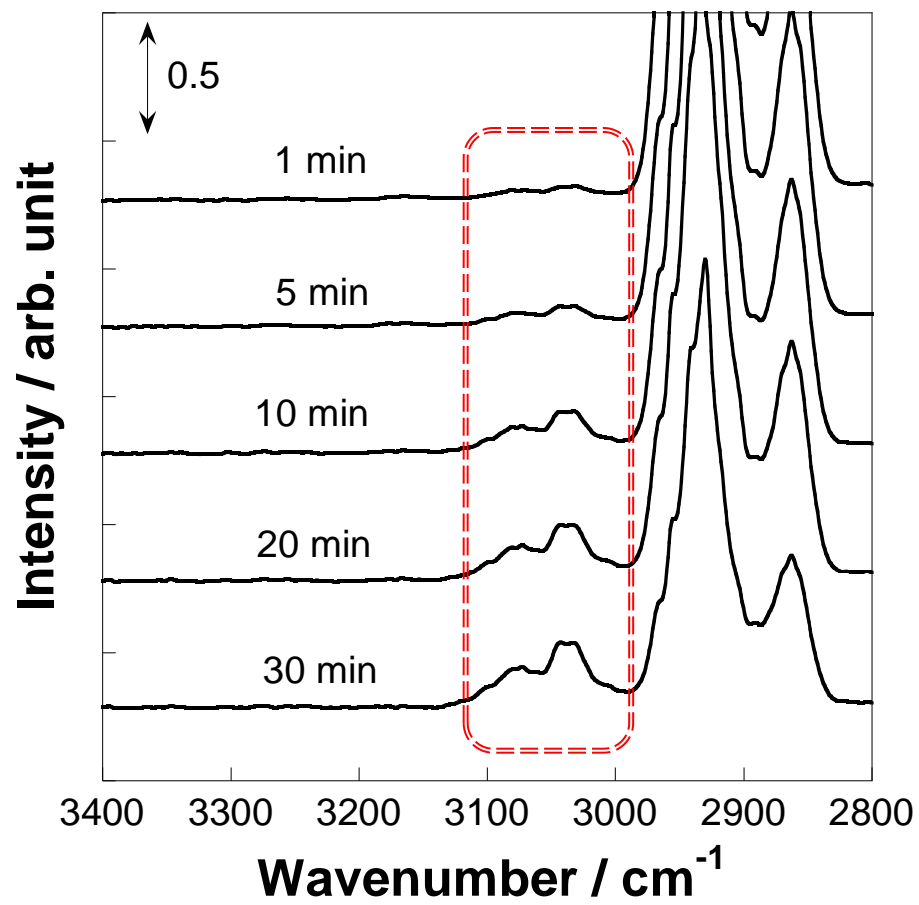

Figure S6 Spectra of *operando* DRIFTS measurements of 3wt%Pt/CeO<sub>2</sub> without the electric field at 523 K in the time course; wavenumbers 2800–3400 cm<sup>-1</sup>.

Table S1 Activity of toluene hydrogenation on 3wt%Pt/CeO<sub>2</sub>; gas supply toluene : H<sub>2</sub> : Ar = 6.4 : 19.2 : 10.8 (total flow 36.4 mL min<sup>-1</sup>); input current 3 mA.

| Condition  | Furnace Temp.<br>/ K | $T_{tc}$<br>/ K | Voltage<br>/ V | Toluene conv.<br>/ % |
|------------|----------------------|-----------------|----------------|----------------------|
| with EF    | 423                  | 420             | 265            | 7.3                  |
|            | 473                  | 465             | 250            | 31.6                 |
|            | 523                  | 503             | 239            | 10.5                 |
|            | 573                  | 543             | 225            | 1.9                  |
|            | 623                  | 591             | 183            | 0.2                  |
|            | 673                  | 636             | 147            | 0.0                  |
| without EF | 423                  | 423             | -              | 21.5                 |
|            | 473                  | 473             | -              | 49.4                 |
|            | 523                  | 523             | -              | 15.8                 |
|            | 573                  | 573             | -              | 1.6                  |
|            | 623                  | 623             | -              | 0.1                  |
|            | 673                  | 673             | -              | 0.0                  |

$T_{tc}$ : Catalyst bed temperature measured using a thermocouple

Table S2 Catalytic activity and response voltage on 3wt%Pt/CeO<sub>2</sub>; gas supply MCH : Ar = 6.4 : 30 (total flow 36.4 mL min<sup>-1</sup>); input current 3 mA.

| Time<br>/ min | with EF (423 K)          |            | without EF (523 K)       |
|---------------|--------------------------|------------|--------------------------|
|               | H <sub>2</sub> yield / % | Voltage /V | H <sub>2</sub> yield / % |
| 2             | 14.7                     | 219        | 21.6                     |
| 10            | 21.5                     | 206        | 21.5                     |
| 25            | 21.4                     | 200        | 21.4                     |
| 40            | 20.8                     | 195        | 21.2                     |
| 55            | 20.1                     | 192        | 20.7                     |
| 70            | 19.3                     | 185        | 20.6                     |
| 85            | 18.5                     | 183        | 20.2                     |
| 100           | 18.2                     | 181        | 19.8                     |
| 115           | 18.0                     | 178        | 18.5                     |
| 145           | 17.7                     | 179        | 18.2                     |
| 175           | 17.8                     | 179        | 18.0                     |
| 205           | 17.9                     | 180        | 17.2                     |
| 235           | 17.9                     | 178        | 16.9                     |
| 265           | 17.7                     | 178        | 16.9                     |
| 295           | 18.0                     | 179        | 16.5                     |
| 325           | 18.0                     | 178        | 16.3                     |
| 355           | 18.3                     | 181        | 15.5                     |
| 385           | 18.0                     | 180        | 14.1                     |
| 415           | 18.1                     | 178        | 13.5                     |
| 445           | 18.1                     | 177        | 12.7                     |
| 475           | 18.0                     | 177        | 12.1                     |

Table S3 Dispersion and metal surface area 3wt%Pt/CeO<sub>2</sub> after each treatment.

| Treatment                                             | Dispersion<br>/ % | Metal surface area<br>/ m <sup>2</sup> g <sup>-1</sup> |
|-------------------------------------------------------|-------------------|--------------------------------------------------------|
| Pt/CeO <sub>2</sub> asmade                            | 15.1              | 1.12                                                   |
| Pt/CeO <sub>2</sub> after reaction with EF (423 K)    | 14.5              | 1.07                                                   |
| Pt/CeO <sub>2</sub> after reaction without EF (523 K) | 14.8              | 1.09                                                   |
